# Supplementary material for: A highly sensitive electrochemical aptasensor for thrombin detection using functionalized mesoporous silica@multiwalled carbon nanotubes as signal tags and DNAzyme signal amplification
Source: Royal Society of Chemistry journal article supplement (doi:10.1039/c3an01587d), 2013-01-01
Supplement: c3an01587d.pdf [file c3an01587d.pdf]

*Supporting information*

**Highly sensitive electrochemical aptasensor for thrombin detection using functionalized mesoporous silica@multiwalled carbon nanotubes as signal tags and DNAzyme signal amplification**

Juan Zhang, Yaqin Chai\*, Ruo Yuan\*, Yali Yuan, Lijuan Bai, Shunbi Xie  
*Key Laboratory of Ministry of Education on Luminescence and Real-Time Analysis,  
School of Chemistry and Chemical Engineering, Southwest University, Chongqing  
400715, PR China*

Fax: +86-23-68253172

E-mail address: yaqinchai@swu.edu.cn, yuanruo@swu.edu.cn.

**Table S1. Comparisons of proposed aptasensor with other detection methods for thrombin analysis**

| Analytical method | Linear range (nM) | Detection limit | Ref.      |
|-------------------|-------------------|-----------------|-----------|
| DPV               | 0.001~30          | 0.39 pM         | 1         |
| DPV               | 0.001~0.1         | 1 pM            | 2         |
| DPV               | 6~60              | 3 nM            | 3         |
| DPV               | 0.001~50          | 0.5 pM          | 4         |
| DPV               | 0.05~40           | 3 pM            | 5         |
| DPV               | 0.8~15            | 0.2 nM          | 6         |
| DPV               | 0.1~5             | 0.06 nM         | 7         |
| DPV               | 0.0001~80         | 0.05 pM         | This work |

**Abbreviation:** differential pulse voltammetry (DPV)

**References:**

- 1 L. J. Bai, R. Yuan, Y. Q. Chai, Y. L. Yuan, Y. Zhuo, L. Mao, *Biosens. Bioelectron.*, 2011, 26, 4331–4336

\* Corresponding author. Tel.: +86-23-68252277; Fax: +86-23-68253172.

E-mail address: [yqchai@swu.edu.cn](mailto:yqchai@swu.edu.cn), (Y. Q. Chai), [yuanruo@swu.edu.cn](mailto:yuanruo@swu.edu.cn) (R. Yuan)

- 2 H. X. Wang, Y. Liu, C. C. Liu, J. Y. Yang, P. Y. Liu, *Electrochem. Commun.*, 2010, 12, 258-261.
- 3 F. F. Yan, F. Wang, Z. L.Chen, *Sens. Actuators, B*, 2011, 160, 1380–1385.
- 4 X. R. Liu, Y. Li, J. B. Zheng, J. C. Zhang, Q. L. Sheng, *Talanta*, 2010, 81, 1619.
- 5 Y. L. Yuan, R. Yuan, Y. Q. Chai, Y. Zhuo, L. J. Bai, Y. H. Liao, *Biosens. Bioelectron.*, 2010, 26, 881.
- 6 J. H. Chen, J. Zhang, J. Li, H. H. Yang, F. F. Fu, G. N. Chen, *Biosens. Bioelectron.*, 2010, 25, 996–1001.
- 7 Y. H. Wang, X. X. He, K. M. Wang, X. Q. Ni, J. Su, Z. F. Chen, *Biosens. Bioelectron.*, 2011, 26, 3536–3541.
